# Supplementary material
Source: publisher figshare collection journal article supplement (https://aacr.figshare.com/articles/dataset/_/22367633)

## Supplemental Figure S2

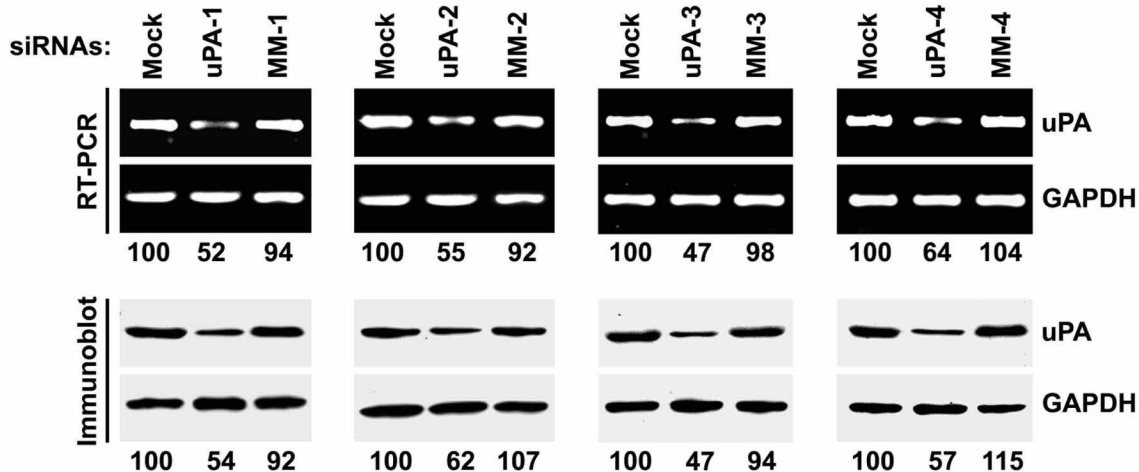

Supplement: Supplementary file 1 [file 39812705]
